# Supplementary material for: Relaying stereochemistry through aromatic ureas: 1,9 and 1,15 remote stereocontrol
Source: Royal Society of Chemistry journal article supplement (doi:10.1039/b817527f), 2008-11-27
Supplement: b817527f.pdf [file b817527f.pdf]

# Relaying stereochemistry through aromatic ureas: 1,9 and 1,15 remote stereocontrol

Jonathan Clayden,\* Mark Pickworth and Lyn H. Jones

## *SUPPORTING INFORMATION*

### General Information

NMR spectra were recorded on a Varian XL 300 or a Bruker Ultrashield 300, 400 or 500 spectrometer. The chemical shifts ( $\delta$ ) are reported in ppm downfield of trimethylsilane and coupling constants ( $J$ ) reported in hertz and rounded to 0.5 Hz. Splitting patterns are abbreviated as follows: singlet (s), doublet (d), triplet (t), quartet (q), multiplet (m), broad (br), or a combination of these. Solvents were used as internal standard when assigning NMR spectra ( $\delta_{\text{H}}$ :  $\text{CDCl}_3$  7.27 ppm;  $\delta_{\text{C}}$ :  $\text{CDCl}_3$  77.0 ppm;  $\delta_{\text{H}}$ :  $\text{DMSO}-d_6$  2.50 ppm;  $\delta_{\text{C}}$ :  $\text{DMSO}-d_6$  39.4 ppm;  $\delta_{\text{H}}$ :  $\text{CD}_3\text{OD}$  3.31 ppm;  $\delta_{\text{C}}$ :  $\text{CD}_3\text{OD}$  49.0 ppm;).

Low and high resolution mass spectra were recorded by staff at the University of Manchester. EI and CI spectra were recorded on a Fisons VG Trio 2000; and high resolution mass spectra (HRMS) were recorded on a Kratos Concept-IS mass spectrometer, and are accurate to  $\pm 0.001$ . Infrared spectra were recorded on an Ati Matson Genesis Series FTIR spectrometer as a film on a sodium chloride plate. Absorptions reported are sharp and strong unless otherwise stated as broad (br), medium (m), or weak (w), only absorption maxima of interest are reported. Melting points (mpt) were determined on a Gallenkamp apparatus and are uncorrected.

Thin layer chromatography (TLC) was performed using commercially available pre-coated plates (Macherey-Nagel alugram Sil G/ $\text{UV}_{254}$ ) and visualised with UV light at 254 nm or phosphomolybdic acid dip (5 % in ethanol). Flash chromatography was carried out using Fluorochem Davisil 40-63u 60 Å.

All reactions were conducted under an atmosphere of dry nitrogen in oven dried glassware. Tetrahydrofuran (THF) was distilled under nitrogen from sodium using benzophenone as indicator. Dichloromethane and toluene were obtained by distillation from calcium hydride under nitrogen. Petrol refers to the fraction of light petroleum ether boiling between 40-65 °C. All other solvents and commercially obtained reagents were used as received or purified using standard procedures.

#### 2-(1,3-Dioxolan-2-yl)benzenamine, 4

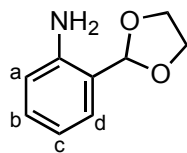

2-Nitrobenzaldehyde (15.0 g, 100 mmol) was dissolved in toluene (200 cm<sup>3</sup>) at room temperature, ethylene glycol (30 cm<sup>3</sup>) and PTSA (0.20 g, 1.2 mmol) were added, the mixture heated to reflux temperature and maintained at this temperature for 18 h. Cooled to room temperature, CH<sub>2</sub>Cl<sub>2</sub> (200 cm<sup>3</sup>) and saturated NaHCO<sub>3</sub> (50 cm<sup>3</sup>) added and the organic layer separated. The aqueous layer was extracted with CH<sub>2</sub>Cl<sub>2</sub> (3 × 50 cm<sup>3</sup>), the combined organic fractions were dried (MgSO<sub>4</sub>), filtered and concentrated under reduced pressure. The residue was purified by flash column chromatography (SiO<sub>2</sub>; 1 % Et<sub>3</sub>N in petrol to 1 % Et<sub>3</sub>N, 10 % EtOAc in petrol) to give 2-(2-nitrophenyl)-1,3-dioxolane (19.1 g, 99 %), as a yellow oil; *R*<sub>f</sub> (20 % EtOAc in petrol) 0.29; *ν*<sub>max</sub> (film)/cm<sup>-1</sup> 1533 (NO<sub>2</sub>); *δ*<sub>H</sub> (300 MHz; CDCl<sub>3</sub>) 7.94 (1 H, dd, *J* 8.0 and 1.5, CH-a), 7.85 (1 H, dd, *J* 8.0 and 1.5, CH-d), 7.67 (1 H, ddd, *J* 8.0, 8.0 and 1.5, CH-c), 7.55 (1 H, ddd, *J* 8.0, 8.0 and 1.5, CH-b), 6.54 [1 H, s, (CHO<sub>2</sub>)] and 4.13-4.06 [4 H, m, (CH<sub>2</sub>) × 2]; *δ*<sub>C</sub> (75 MHz; CDCl<sub>3</sub>) 149.1 (C), 133.5 (C), 133.2 (CH), 129.9 (CH), 127.9 (CH), 124.7 (CH), 99.8 (CH) and 65.6 [(CH<sub>2</sub>) × 2]; *m/z* (CI) 213 (100 %, M+NH<sub>4</sub><sup>+</sup>); (Found: M+NH<sub>4</sub><sup>+</sup>, 213.0870, C<sub>9</sub>H<sub>13</sub>N<sub>2</sub>O<sub>4</sub> requires *M*+*H*, 213.0870).

The 2-(2-nitrophenyl)-1,3-dioxolane (18.0 g, 92.0 mmol) was dissolved in IPA (200 cm<sup>3</sup>), triethylamine (50 cm<sup>3</sup>, 36 mmol), 10 % palladium on carbon (0.98 g, 0.92 mmol) added and the suspension stirred under a hydrogen atmosphere for 18 h. The suspension was filtered through celite and the filtrate dissolved in CH<sub>2</sub>Cl<sub>2</sub> (100 cm<sup>3</sup>). The organic layer was washed with saturated NaHCO<sub>3</sub> (2 × 50 cm<sup>3</sup>), dried (MgSO<sub>4</sub>), filtered and concentrated under reduced pressure. The residue was purified by flash column chromatography (SiO<sub>2</sub>; 1 % Et<sub>3</sub>N in petrol to 1 % Et<sub>3</sub>N, 10 % EtOAc in petrol) to give 2-(1,3-dioxolan-2-yl)benzenamine 4 (15.2 g, 98 %), as a yellow oil; *R*<sub>f</sub> (20 % EtOAc in petrol) 0.25; *ν*<sub>max</sub> (film)/cm<sup>-1</sup> 3490, 3389 and 1623 (N-H); *δ*<sub>H</sub> (300 MHz; CDCl<sub>3</sub>) 7.36 (1 H, dd, *J* 8.0 and 1.5, CH-d), 7.22 (1 H, ddd, *J* 8.0, 8.0 and 1.5, CH-b), 6.82 (1 H, ddd, *J* 8.0, 8.0 and 1.5, CH-c), 6.77 (1 H, dd, *J* 8.0 and 1.5, CH-a), 5.88 [1 H, s, (CHO<sub>2</sub>)] and 4.20-4.07 [4 H, m, (CH<sub>2</sub>) × 2]; *δ*<sub>C</sub> (75 MHz; CDCl<sub>3</sub>) 145.5 (C), 130.3 (CH), 127.8 (CH), 121.5 (C), 118.2 (CH), 116.8 (CH), 103.6 (CH), and 65.1 [(CH<sub>2</sub>) × 2]; *m/z* (CI) 166 (100 %, M+H<sup>+</sup>); (Found: M+H<sup>+</sup>, 166.0864, C<sub>9</sub>H<sub>12</sub>NO<sub>2</sub> requires *M*+*H*, 166.0863).

***1-(2-(1,3-Dioxolan-2-yl)phenyl)-3-(2-bromophenyl)-1,3-dimethylurea, 5***

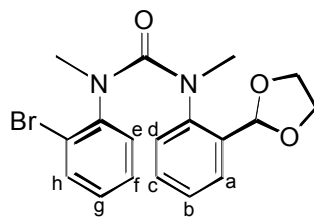

2-(1,3-Dioxolan-2-yl)benzenamine **4** (0.50 g, 3.0 mmol) was dissolved in  $\text{CH}_2\text{Cl}_2$  at room temperature, 2-bromophenylisocyanate (0.36  $\text{cm}^3$ , 3.0 mmol) added dropwise and stirred for 18 h. The precipitate was isolated to give *1-(2-(1,3-dioxolan-2-yl)phenyl)-3-(2-bromophenyl)urea* (1.05g, 97 %), as colourless cubes, m.p. 195-198 °C (from EtOAc-pentane);  $R_f$  (EtOAc) 0.50;  $\nu_{\text{max}}$  (film)/ $\text{cm}^{-1}$  3435 (NH), 1686 (C=O) and 759 (C-Br);  $\delta_{\text{H}}$  (300 MHz;  $d_6$ -DMSO) 8.67 [2 H, s, (NH)  $\times$  2], 7.91 (1 H, dd,  $J$  8.0 and 1.5, CH-e), 7.71 (1 H, dd,  $J$  8.0 and 1.5, CH-d), 7.61 (1 H, dd,  $J$  8.0 and 1.5, CH-h), 7.45 (1 H, dd,  $J$  8.0 and 1.5, CH-a), 7.35 (1 H, td,  $J$  8.0 and 1.5, CH-f), 7.31 (1 H, td,  $J$  8.0 and 1.5, CH-c), 7.11 (1 H, td,  $J$  8.0 and 1.5, CH-b), 6.99 (1 H, td,  $J$  8.0 and 1.5, CH-g), 5.88 [1 H, s, (CHO<sub>2</sub>)], 4.13-4.03 [2 H, m, (OCH<sub>2</sub>CH<sub>2</sub>O)] and 4.03-3.93 [2 H, m, (OCH<sub>2</sub>CH<sub>2</sub>O)];  $\delta_{\text{C}}$  (75 MHz;  $d_6$ -DMSO) 153.5 (C=O), 137.8 (C), 137.6 (C), 133.2 (CH), 129.9 (CH), 129.1 (C), 128.7 (CH), 127.6 (CH), 125.3 (CH), 124.6 (CH), 124.5 (CH), 124.0 (CH), 115.1 (C), 100.9 (CH) and 65.5 [(CH<sub>2</sub>)  $\times$  2];  $m/z$  (ES<sup>+</sup>) 363 (100 %,  $M+H^+$ ); (Found:  $M+H^+$ , 363.0349,  $\text{C}_{16}\text{H}_{15}\text{N}_2\text{O}_3$  requires  $M+H$ , 363.0345).

The *1-(2-(1,3-Dioxolan-2-yl)phenyl)-3-(2-bromophenyl)urea* (2.0 g, 5.5 mmol) was dissolved in THF (40  $\text{cm}^3$ ) and cooled to 0 °C. Sodium hydride (0.66 g, 16 mmol) was added portionwise and stirred at room temperature for 1 h. Methyl iodide (1.05  $\text{cm}^3$ , 16 mmol) was added and stirred at room temperature for 19 h. Water (50  $\text{cm}^3$ ) was added and extracted with EtOAc (3  $\times$  30  $\text{cm}^3$ ). The combined organic fractions were dried ( $\text{MgSO}_4$ ), filtered and concentrated under reduced pressure. The residue was purified by flash column chromatography ( $\text{SiO}_2$ ; 10 % EtOAc and 2 % Et<sub>3</sub>N in petrol) to give *1-(2-(1,3-dioxolan-2-yl)phenyl)-3-(2-bromophenyl)-1,3-dimethylurea 5* (2.10 g, 98 %), as colourless cubes, m.p. 202-204 °C (from EtOAc-pentane);  $R_f$  (50 % EtOAc in petrol) 0.24;  $\nu_{\text{max}}$  (film)/ $\text{cm}^{-1}$  1711 (C=O) and 733 (C-Br);  $\delta_{\text{H}}$  (300 MHz;  $\text{CDCl}_3$ ) 7.40-7.30 (2 H, m, CH-d and CH-e), 7.11-6.93 (2 H, m, CH-a and CH-h), 6.91-6.80 (2 H, m, CH-c and CH-f), 6.86-6.56 (2 H, m, CH-b and CH-g), 5.70 [1 H, s, (CHO<sub>2</sub>)], 4.18-4.11 [2 H, m, (OCH<sub>2</sub>CH<sub>2</sub>O)], 4.10-3.98 [2 H, m, (OCH<sub>2</sub>CH<sub>2</sub>O)], 3.25 [3 H, s, (NCH<sub>3</sub>)<sub>A</sub>] and 3.17 [3 H, s, (NCH<sub>3</sub>)<sub>B</sub>];  $\delta_{\text{C}}$  (75 MHz;  $\text{CDCl}_3$ ) 157.5 (C=O), 143.9 (C), 143.1 (C), 133.3 (CH), 130.2 (CH), 130.0 (CH), 128.3 (C), 127.9 (CH), 127.7 (CH), 127.3 (CH), 126.9 (CH), 126.8 (CH), 110.0 (C), 99.7 (CH), 65.5 (CH<sub>2</sub>), 64.0 (CH<sub>2</sub>), 40.7 (NCH<sub>3</sub>)<sub>A</sub> and 39.1 (NCH<sub>3</sub>);  $m/z$  (ES<sup>+</sup>) 391 (100 %,  $M+H^+$ ); (Found:  $M+H^+$ , 391.0660,  $\text{C}_{18}\text{H}_{19}\text{N}_2\text{O}_3\text{S}$  requires  $M+H$ , 391.0658).

**1-(2-(1,3-Dioxolan-2-yl)phenyl)-3-(2-(tert-butylsulfinyl)phenyl)-1,3-dimethylurea, 6**

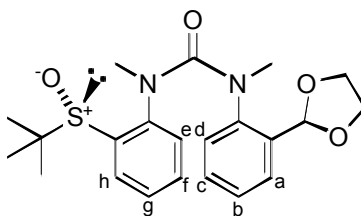

1-(2-(1,3-Dioxolan-2-yl)phenyl)-3-(2-bromophenyl)-1,3-dimethylurea **5** (2.0 g, 5.2 mmol) was dissolved in THF (90 cm<sup>3</sup>) and cooled to –90 °C. *n*-Butyllithium (2.40 cm<sup>3</sup>, 5.72, 2.38 mmol in hexanes) was added dropwise and stirred for 1 min at –90 °C. After this time, (*S*)-*tert*-Butyl 2-methylpropane-2-sulfinothioate [1.13 g, 5.72 mmol in THF (10 cm<sup>3</sup>)]<sup>1</sup> was added in one portion and stirred at –90 °C for 5 min. After warming to room temperature over 18 h, saturated aqueous ammonium chloride (10 cm<sup>3</sup>) and water (20 cm<sup>3</sup>) were added and the aqueous layer extracted with EtOAc (3 × 50 cm<sup>3</sup>). The combined organic fractions were dried (MgSO<sub>4</sub>), filtered and concentrated under reduced pressure. The residue was purified by flash column chromatography (SiO<sub>2</sub>; 20 % EtOAc and 2 % Et<sub>3</sub>N in petrol) to give 1-(2-(1,3-dioxolan-2-yl)phenyl)-3-(2-(tert-butylsulfinyl)phenyl)-1,3-dimethylurea **6** (1.41 g, 65 %), as colourless cubes, m.p. 232-234 °C (from EtOAc-pentane); [ $\alpha$ ]<sub>D</sub><sup>22</sup> = – 36.0 (c = 0.5 in CH<sub>2</sub>Cl<sub>2</sub>); *R*<sub>f</sub> (EtOAc) 0.15;  $\nu_{\text{max}}$  (film)/cm<sup>–1</sup> 1648 (C=O) and 1069 (S=O);  $\delta_{\text{H}}$  (300 MHz; CDCl<sub>3</sub>) 7.40-7.30 (1 H, d, *J* 8.0, CH-d), 7.35 (1 H, br., CH-e), 7.20-6.66 (4 H, br., CH-a, CH-c, CH-f and CH-h), 6.66-6.30 (2 H, br., CH-b and CH-g), 5.68 [1 H, br., (CHO<sub>2</sub>)], 4.34-3.84 [4 H, br., (OCH<sub>2</sub>CH<sub>2</sub>O)], 3.27 [3 H, s, (NCH<sub>3</sub>)<sub>A</sub>], 3.23 [3 H, s, (NCH<sub>3</sub>)<sub>B</sub>] and 1.20 [9 H, s, (CH<sub>3</sub>) × 3];  $\delta_{\text{C}}$  (75 MHz; CDCl<sub>3</sub>) 159.7 (C=O), 144.3 (C), 143.2 (C), 131.9 (CH), 131.0 (C), 130.3 (CH), 130.1 (CH), 129.3 (CH), 129.2 (CH), 127.1 (CH), 126.4 (CH), 125.6 (CH), 110.0 (C), 99.4 (CH), 65.4 [(CH<sub>2</sub>) × 2], 56.0 (C), 40.4 (NCH<sub>3</sub>)<sub>A</sub>, 39.7 (NCH<sub>3</sub>)<sub>B</sub> and 11.7 [(CH<sub>3</sub>) × 3]; *m/z* (ES<sup>+</sup>) 431 (100 %, M+H<sup>+</sup>); (Found: M+H<sup>+</sup>, 418.1929, C<sub>22</sub>H<sub>29</sub>N<sub>2</sub>O<sub>4</sub>S requires *M*+*H*, 418.1927).

**1-(2-(tert-Butylsulfinyl)phenyl)-3-(2-formylphenyl)-1,3-dimethylurea, 7**

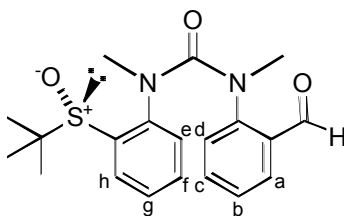

1-(2-(1,3-Dioxolan-2-yl)phenyl)-3-(2-(tert-butylsulfinyl)phenyl)-1,3-dimethylurea **6** (0.90 g, 2.2 mmol) was dissolved in THF (40 cm<sup>3</sup>), 1 N aqueous hydrochloric acid (30 cm<sup>3</sup>) added and stirred at room temperature for 16 h. The aqueous layer was extracted with EtOAc (3 × 20 cm<sup>3</sup>), the combined organic fractions dried (MgSO<sub>4</sub>), filtered and concentrated under reduced pressure. The residue was purified by flash column chromatography (SiO<sub>2</sub>; 40 % EtOAc in petrol) to give 1-(2-(tert-butylsulfinyl)phenyl)-3-(2-formylphenyl)-1,3-dimethylurea **7**

(0.79 g, 98 %), as colourless cubes, m.p. 224-226 °C (from EtOAc-pentane);  $[\alpha]_D^{24} = -40.0$  ( $c = 0.2$  in  $\text{CDCl}_3$ );  $R_f$  (EtOAc) 0.12;  $\nu_{\text{max}}$  (film)/ $\text{cm}^{-1}$  1687 (HC=O), 1660 (C=O) and 1034 (S=O);  $\delta_H$  (300 MHz;  $\text{CDCl}_3$ ) 10.05 (1 H, s, CH=O), 7.68 (1 H, dd,  $J$  8.0 and 1.5, CH-d), 7.61 (1 H, dd,  $J$  8.0 and 1.5, CH-a), 7.22 (1 H, br., CH-c), 7.15-7.03 (2 H, m, CH-g and CH-f), 6.94 (1 H, td,  $J$  8.0 and 1.5, CH-b), 6.87 (1 H, br., CH-e) 6.35 (1 H, dd,  $J$  8.0 and 1.5, CH-h), 3.43 [3 H, s,  $(\text{NCH}_3)_A$ ], 3.25 [3 H, s,  $(\text{NCH}_3)_B$ ] and 1.21 [9 H, s,  $(\text{CH}_3) \times 3$ ];  $\delta_C$  (75 MHz;  $\text{CDCl}_3$ ) 190.0 (HC=O), 160.3 (C=O), 143.5 (C), 139.2 (C), 138.1 (C), 134.9 (CH), 132.2 (CH), 128.3 (CH), 128.2 (CH), 127.7 (CH), 126.6 (CH), 126.4 (CH), 125.9 (CH), 56.3 (C), 39.3  $(\text{NCH}_3)_A$ , 39.0  $(\text{NCH}_3)_B$  and 23.1  $[(\text{CH}_3) \times 3]$ ;  $m/z$  ( $\text{ES}^+$ ) 374 (100 %,  $\text{M}+\text{H}^+$ ); (Found:  $\text{M}+\text{H}^+$ , 374.1667,  $\text{C}_{20}\text{H}_{25}\text{N}_2\text{O}_3\text{S}$  requires  $\text{M}+\text{H}$ , 374.1665).

**1-(2-(1,3-Dioxolan-2-yl)phenyl)-1,3-dibenzyl-3-phenylurea, 8**

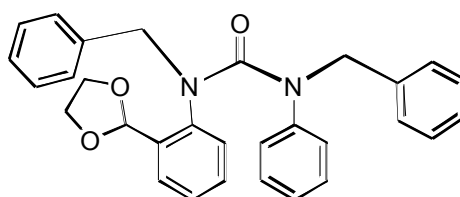

2-(1,3-Dioxolan-2-yl)benzenamine **4** (1.64 g, 10.0 mmol) was dissolved in  $\text{CH}_2\text{Cl}_2$  (50  $\text{cm}^3$ ). Phenyl isocyanate (10.9  $\text{cm}^3$ , 10.0 mmol) was added dropwise, stirred for 60 h and concentrated under reduced pressure. The residue was recrystallised from  $\text{CH}_2\text{Cl}_2$ -petrol to give 1-(2-(1,3-Dioxolan-2-yl)phenyl)-3-phenylurea (2.69 g, 95 %) as white cubes, m.p. 167-169 °C (from  $\text{CH}_2\text{Cl}_2$ -petrol);  $R_f$  (2 %  $\text{Et}_3\text{N}$ , 49 % EtOAc in petrol) 0.50;  $\nu_{\text{max}}$  (film)/ $\text{cm}^{-1}$  3584 (N-H) and 1710 (C=O);  $\delta_H$  (300 MHz;  $\text{CDCl}_3$ ) 9.39 [1 H, s,  $(\text{NH})_A$ ], 8.06 [1 H, s,  $(\text{NH})_B$ ], 7.87 (1 H, dd,  $J$  8.0 and 1.0, CH-a), 7.55-7.44 (3 H, m, CH-d and CH-e), 7.42-7.27 (3 H, m, CH-c and CH-f), 7.11 (1 H, ddd,  $J$  8.0, 7.5 and 1.0, CH-b), 7.01 (1 H, tt,  $J$  8.0 and 1.0, CH-g), 5.87 [1 H, s,  $(\text{CHO}_2)$ ], 4.18-4.09 [2 H, m,  $(\text{OCH}_2\text{CH}_2\text{O})$ ] and 4.09-4.00 [2 H, m,  $(\text{OCH}_2\text{CH}_2\text{O})$ ];  $\delta_C$  (75 MHz;  $\text{CDCl}_3$ ) 153.3 (C=O), 140.6 (C), 138.0 (C), 130.0 (CH), 129.5 (CH), 127.7 (CH), 127.6 (C), 123.6 (CH), 123.3 (CH), 122.5 (CH), 119.0 (CH), 101.7 (CH) and 65.5  $[(\text{CH}_2) \times 2]$ ;  $m/z$  ( $\text{ES}^+$ ) 307 (100 %,  $\text{M}+\text{Na}^+$ ); (Found:  $\text{M}+\text{Na}^+$ , 307.1056,  $\text{C}_{16}\text{H}_{16}\text{N}_2\text{O}_3\text{Na}$  requires  $\text{M}+\text{Na}$ , 307.1053).

The 1-(2-(1,3-Dioxolan-2-yl)phenyl)-3-phenylurea (1.60 g, 5.65 mmol) was dissolved in THF (57  $\text{cm}^3$ ) and cooled to 0 °C. Sodium hydride (0.90 g, 23 mmol) was added portionwise and stirred at room temperature for 2 h. Benzyl bromide (2.74  $\text{cm}^3$ , 23.0 mmol) was added dropwise and stirred at room temperature for 19 h. Water (50  $\text{cm}^3$ ) was added and extracted with EtOAc (3  $\times$  40  $\text{cm}^3$ ). The combined organic fractions were dried ( $\text{MgSO}_4$ ), filtered and concentrated under reduced pressure. The residue was purified by flash column chromatography ( $\text{SiO}_2$ ; 2 %  $\text{Et}_3\text{N}$ , 10 % EtOAc in petrol) to give 1-(2-(1,3-dioxolan-2-yl)phenyl)-1,3-dibenzyl-3-phenylurea **8** (1.33 g, 51 %) as a colourless oil,  $R_f$  (2 %  $\text{Et}_3\text{N}$ , 49 % EtOAc in petrol) 0.31;  $\nu_{\text{max}}$  (film)/ $\text{cm}^{-1}$  1715 (C=O);  $\delta_H$  (300 MHz;  $\text{CDCl}_3$ ) 7.54-7.34 (10 H, m, Ar), 7.10 (1 H, dd,  $J$  7.5 and 7.0, Ar), 7.04-6.96 (2 H, br., Ar), 6.87 (1 H, dd,  $J$  8.0 and 7.5, Ar), 6.76-6.67 (2 H, br., Ar), 6.35 (1 H, d,  $J$  8.0, Ar), 5.66 [1 H, s,  $(\text{CHO}_2)$ ], 5.10-

4.70 [4 H, br., (NCH<sub>2</sub>Ar) × 2], 4.20-4.05 [2 H, br., (OCH<sub>2</sub>CH<sub>2</sub>O)] and 4.04-3.80 [2 H, br., (OCH<sub>2</sub>CH<sub>2</sub>O)]; δ<sub>C</sub> (75 MHz; CDCl<sub>3</sub>) 161.5 (C=O), 143.8 (C), 142.8 (C), 138.8 (C), 138.6 (C), 135.0 (C), 129.6 (CH), 129.2 (CH), 129.0 (CH), 128.9 (CH), 128.6 (CH), 128.5 (CH), 128.1 (CH), 127.9 (CH), 127.6 (CH), 127.4 (CH), 126.8 (CH), 126.0 (CH), 125.6 (CH), 99.9 (CH), 65.6 [(CH<sub>2</sub>) × 2], 56.4 (NCH<sub>2</sub>Ar)<sub>A</sub> and 56.1 (NCH<sub>2</sub>Ar)<sub>B</sub>; m/z (ES<sup>+</sup>) 487 (100 %, M+Na<sup>+</sup>); (Found: M+Na<sup>+</sup>, 487.2001, C<sub>30</sub>H<sub>28</sub>N<sub>2</sub>O<sub>3</sub>Na requires M+Na, 487.1998).

**1,3-Dibenzyl-1-(2-formylphenyl)-3-phenylurea, 9**

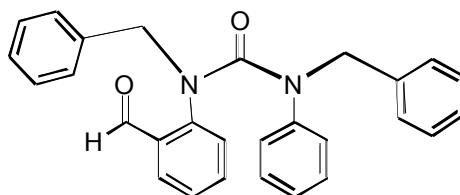

1-(2-(1,3-Dioxolan-2-yl)phenyl)-1,3-dibenzyl-3-phenylurea **8** (1.30 g, 2.80 mmol) was dissolved in THF (28 cm<sup>3</sup>), 1 N aqueous hydrochloric acid (30 cm<sup>3</sup>) added and stirred at room temperature for 16 h. The aqueous layer was extracted with EtOAc (3 × 20 cm<sup>3</sup>), the combined organic fractions dried (MgSO<sub>4</sub>), filtered and concentrated under reduced pressure. The residue was purified by flash column chromatography (SiO<sub>2</sub>; 40 % EtOAc in petrol) to give 1,3-dibenzyl-1-(2-formylphenyl)-3-phenylurea **9** (1.18 g, 99 %) as a colourless oil, *R*<sub>f</sub> (2 % Et<sub>3</sub>N, 49 % EtOAc in petrol) 0.76; ν<sub>max</sub> (film)/cm<sup>-1</sup> 1715 (C=O) and 1655 (C=O); δ<sub>H</sub> (400 MHz; CDCl<sub>3</sub>) 9.59 (1 H, s, CHO), 7.54 (1 H, dd, *J* 8.0 and 2.0, Ar), 7.30-7.23 (10 H, m Ar), 7.19 (1 H, ddd, 8.0, 8.0 and 2.0, Ar), 7.11 (1 H, dd, *J* 7.5 and 7.0, Ar), 6.95-6.89 (3 H, m, Ar), 6.63 (1 H, dd, *J* 8.0 and 1.0, Ar), 6.54-6.47 (2 H, m, Ar), 4.91 [2 H, s, (NCH<sub>2</sub>Ar)<sub>A</sub>] and 4.77 [2 H, s, (NCH<sub>2</sub>Ar)<sub>B</sub>]; δ<sub>C</sub> (100 MHz; CDCl<sub>3</sub>) 189.4 (CHO), 161.1 (C=O), 145.7 (C), 142.8 (C), 137.5 (C), 136.6 (C), 134.0 (CH), 132.2 (C), 129.5 (CH), 129.4 (CH), 129.2 (CH), 128.7 (CH), 128.3 (CH), 128.1 (CH), 127.9 (CH), 127.8 (CH), 127.7 (CH), 127.3 (CH), 126.5 (CH), 125.9 (CH), 56.4 (NCH<sub>2</sub>Ar)<sub>A</sub> and 55.8 (NCH<sub>2</sub>Ar)<sub>B</sub>; m/z (ES<sup>+</sup>) 423 (100 %, M+Na<sup>+</sup>); (Found: M+Na<sup>+</sup>, 423.1742, C<sub>28</sub>H<sub>24</sub>N<sub>2</sub>O<sub>2</sub>Na requires M+Na, 423.1730).

**(*S,S*)-1-(2-(*tert*-Butylsulfinyl)phenyl)-3-(2-(hydroxy(phenyl)methyl)phenyl)-1,3-dimethylurea 10a** (Nu = Ph)

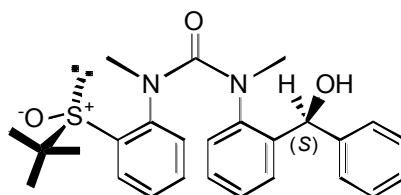

1-(2-(*tert*-Butylsulfinyl)phenyl)-3-(2-formylphenyl)-1,3-dimethylurea **7** (0.10 g, 0.27 mmol) was dissolved in THF (5 cm<sup>3</sup>), cooled to −78 °C and DMPU (0.10 cm<sup>3</sup>, 1.0 mmol) added. PhMgBr (0.54 cm<sup>3</sup>, 0.54 mmol, 1.0 M in hexanes) was added dropwise and stirred at −78 °C for 4 h. MeOH (5 cm<sup>3</sup>) was added, warmed to room temperature and water (10 cm<sup>3</sup>) added. The aqueous layer was extracted with EtOAc (3 × 20 cm<sup>3</sup>) and the

combined organic fractions dried (MgSO<sub>4</sub>), filtered and concentrated under reduced pressure. The residue was purified by flash column chromatography (SiO<sub>2</sub>; Pentane to EtOAc) and recrystallisation to give *1-(2-(tert-butylsulfinyl)phenyl)-3-(2-(hydroxy-(phenyl)methyl) phenyl) -1,3-dimethylurea 10a* (Nu = Ph) (0.115 g, 95 %), as colourless cubes, m.p. 189-191 °C (from EtOAc-pentane); [ $\alpha$ ]<sub>D</sub><sup>24</sup> = – 353 (c = 0.2 in CH<sub>2</sub>Cl<sub>2</sub>); *R*<sub>f</sub> (EtOAc) 0.48;  $\nu_{\text{max}}$  (film)/cm<sup>–1</sup> 3390 (OH) and 1648 (C=O);  $\delta_{\text{H}}$  (400 MHz; CDCl<sub>3</sub>) 7.62 (1 H, d, *J* 8.0, Ar), 7.32-6.40 (12 H, m, Ar), 5.89, [1 H, s, Ar(CH)OHAr], 3.28 [3 H, s, (NCH<sub>3</sub>)<sub>A</sub>], 2.91 [3 H, s, (NCH<sub>3</sub>)<sub>B</sub>] and 1.15 [9 H, s, (CH<sub>3</sub>) × 3];  $\delta_{\text{C}}$  (100 MHz; CDCl<sub>3</sub>) 159.8 (C=O), 144.8 (C), 144.4 (C), 140.7 (C), 137.8 (C), 137.7 (C), 132.2 (CH), 129.3 (CH), 128.5 (CH), 128.1 (CH), 127.6 (CH), 127.5 (CH), 127.2 (CH), 126.9 (CH), 126.5 (CH), 125.9 (CH), 125.6 (CH), 71.1 (CH), 56.0 (C), 40.0 (NCH<sub>3</sub>)<sub>A</sub>, 39.7 (NCH<sub>3</sub>)<sub>B</sub> and 23.1 [(CH<sub>3</sub>) × 3]; *m/z* (ES<sup>+</sup>) 451 (100 %, M+H<sup>+</sup>); (Found: M+H<sup>+</sup>, 451.2044, C<sub>26</sub>H<sub>30</sub>N<sub>2</sub>O<sub>3</sub>S requires *M+H*, 451.2050).

This procedure was repeated as above at different temperatures, using different reaction conditions and with different Grignard reagents as described in Chapter 2.

***(S,R)-1-(2-(tert-Butylsulfinyl)phenyl)-3-(2-(hydroxy(phenyl)methyl)phenyl)-1,3-dimethylurea, 10b*** (Nu = Ph)

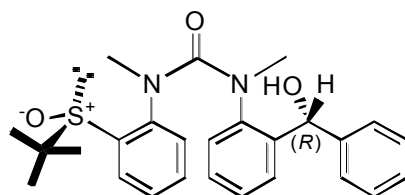

*1-(2-(tert-Butylsulfinyl)phenyl)-3-(2-(benzoyl)phenyl)-1,3-dimethylurea 11* (0.10 g, 0.22 mmol) was dissolved in CH<sub>2</sub>Cl<sub>2</sub> (5 cm<sup>3</sup>) and cooled to –78 °C. DibalH (0.44 cm<sup>3</sup>, 0.44 mmol, 1.0 M in hexanes) was added dropwise and stirred at –78 °C for 8 h. MeOH (5 cm<sup>3</sup>) was added, warmed to room temperature and water (10 cm<sup>3</sup>) added. The aqueous layer was extracted with EtOAc (3 × 20 cm<sup>3</sup>) and the combined organic fractions dried (MgSO<sub>4</sub>), filtered and concentrated under reduced pressure. The residue was purified by flash column chromatography (SiO<sub>2</sub>; Pentane to EtOAc) and recrystallisation to give *1-(2-(tert-butylsulfinyl)phenyl)-3-(2-(hydroxy-(phenyl)methyl) phenyl) -1,3-dimethylurea 10b* (Nu = Ph) (0.115 g, 95 %), as colourless cubes, m.p. 189-191 °C (from EtOAc-pentane); [ $\alpha$ ]<sub>D</sub><sup>24</sup> = + 80 (c = 0.2 in CH<sub>2</sub>Cl<sub>2</sub>); *R*<sub>f</sub> (EtOAc) 0.48;  $\nu_{\text{max}}$  (film)/cm<sup>–1</sup> 3390 (OH) and 1648 (C=O);  $\delta_{\text{H}}$  (400 MHz; CDCl<sub>3</sub>) 7.62 (1 H, d, *J* 8.0, Ar), 7.32-6.40 (12 H, m, Ar), 5.81, [1 H, s, Ar(CH)OHAr], 3.28 [3 H, s, (NCH<sub>3</sub>)<sub>A</sub>], 2.91 [3 H, s, (NCH<sub>3</sub>)<sub>B</sub>] and 1.15 [9 H, s, (CH<sub>3</sub>) × 3];  $\delta_{\text{C}}$  (100 MHz; CDCl<sub>3</sub>) 159.8 (C=O), 144.8 (C), 144.4 (C), 140.7 (C), 137.8 (C), 137.7 (C), 132.2 (CH), 129.3 (CH), 128.5 (CH), 128.1 (CH), 127.6 (CH), 127.5 (CH), 127.2 (CH), 126.9 (CH), 126.5 (CH), 125.9 (CH), 125.6 (CH), 71.1 (CH), 56.0 (C), 40.0 (NCH<sub>3</sub>)<sub>A</sub>, 39.7 (NCH<sub>3</sub>)<sub>B</sub> and 23.1 [(CH<sub>3</sub>) × 3]; *m/z* (ES<sup>+</sup>) 451 (100 %, M+H<sup>+</sup>); (Found: M+H<sup>+</sup>, 451.2044, C<sub>26</sub>H<sub>30</sub>N<sub>2</sub>O<sub>3</sub>S requires *M+H*, 451.2050).

**1-(2-(*tert*-Butylsulfinyl)phenyl)-3-(2-(benzoyl)phenyl)-1,3-dimethylurea, 11**

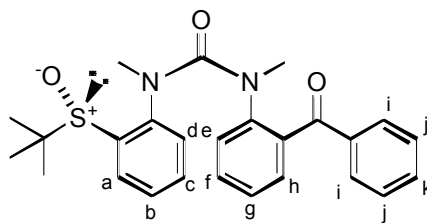

PCC (0.10 g, 0.50 mmol) was dissolved in  $\text{CH}_2\text{Cl}_2$  (10  $\text{cm}^3$ ) at room temperature, 1-(2-(*tert*-Butylsulfinyl)phenyl)-3-(2-(hydroxy(phenyl)methyl)phenyl)-1,3-dimethylurea **10** (Nu = Ph) (0.15 g, 0.35 mmol) in  $\text{CH}_2\text{Cl}_2$  (5  $\text{cm}^3$ ) added dropwise and stirred for 2 h. Diethyl ether (30  $\text{cm}^3$ ) was added, the precipitate isolated, washed with ether (3  $\times$  30  $\text{cm}^3$ ) and the combined organics concentrated under reduced pressure. The residue was purified by flash column chromatography ( $\text{SiO}_2$ ; Pentane to EtOAc) and precipitation to give 1-(2-(*tert*-butylsulfinyl)phenyl)-3-(2-(benzoyl)phenyl)-1,3-dimethylurea **11** (0.14 g, 98 %), as a colourless foam, m.p. 165-167  $^\circ\text{C}$  (from EtOAc-pentane);  $[\alpha]_{\text{D}}^{24} = -18.0$  ( $c = 0.5$  in  $\text{CH}_2\text{Cl}_2$ );  $R_f$  (EtOAc) 0.46;  $\nu_{\text{max}}$  (film)/ $\text{cm}^{-1}$  1686 (C=O) and 1650 (C=O);  $\delta_{\text{H}}$  (400 MHz;  $\text{CDCl}_3$ ) 7.62 (2 H, dd,  $J$  8.0 and 2.0, CH-i), 7.58 (2 H, m, CH-a and CH-b) 7.46 (2 H, m, CH-e and CH-k), 7.21 (1 H, m, CH-f), 6.96 (4 H, m, CH-c, CH-g and CH-j), 6.79 (1 H, d,  $J$  8.0, CH-d), 6.71 (1 H, d,  $J$  8.0, CH-h), 3.02 [3 H, s, (NCH<sub>3</sub>)<sub>A</sub>], 2.99 [3 H, s, (NCH<sub>3</sub>)<sub>B</sub>] and 1.05 [9 H, s, (CH<sub>3</sub>)  $\times$  3];  $\delta_{\text{C}}$  (100 MHz;  $\text{CDCl}_3$ ) 197.1 (C=O), 158.1 (C=O), 144.0 (C), 143.0 (C), 138.0 (C), 137.0 (C), 136.0 (C), 133.7 (CH), 132.0 (CH), 131.8 (CH), 131.0 (CH), 129.7 (CH), 129.2 (CH), 128.5 (CH), 127.8 (CH), 127.0 (CH), 126.5 (CH), 125.5 (CH), 56.0 (C), 39.5 (NCH<sub>3</sub>)<sub>A</sub>, 38.6 (NCH<sub>3</sub>)<sub>B</sub> and 22.9 [(CH<sub>3</sub>)  $\times$  3];  $m/z$  ( $\text{ES}^+$ ) 449 (50 %,  $M+H^+$ ); (Found:  $M+H^+$ , 449.1892,  $\text{C}_{26}\text{H}_{28}\text{N}_2\text{O}_3\text{S}$  requires  $M+H$ , 449.1894).

**1-(2-(1,3-Dioxolan-2-yl)phenyl)-3-(3-aminophenyl)urea, 12**

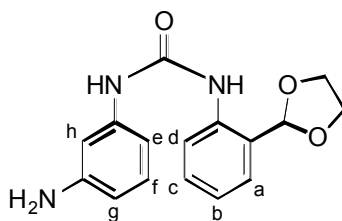

2-(1,3-Dioxolan-2-yl)benzenamine **4** (4.1 g, 25 mmol) was dissolved in THF (150  $\text{cm}^3$ ). 3-Nitrophenyl isocyanate (4.1 g, 25 mmol) was added portionwise and stirred at room temperature for 18 h. The mixture was concentrated under reduced pressure and the residue purified by recrystallisation from  $\text{CH}_2\text{Cl}_2$ /petrol to give 1-(2-(1,3-dioxolan-2-yl)phenyl)-3-(3-nitrophenyl)urea (7.22 g, 88 %) as pale yellow cubes, m.p. 191-193  $^\circ\text{C}$  (from  $\text{CH}_2\text{Cl}_2$ -petrol);  $R_f$  (2% Et<sub>3</sub>N, 48 % EtOAc in petrol) 0.22;  $\nu_{\text{max}}$  (film)/ $\text{cm}^{-1}$  3438 (NH), 1663 (C=O), 1551 and 1351 ( $\text{NO}_2$ );  $\delta_{\text{H}}$  (300 MHz;  $d_6$ -DMSO) 9.91 [1 H, s, (NH)<sub>A</sub>], 9.50 [1 H, s, (NH)<sub>B</sub>], 8.58 (1 H, ddd,  $J$  2.0, 2.0 and 2.0, CH-h), 7.88 (1 H, dd,  $J$  8.0 and 1.0, CH-a), 7.80 (1 H, ddd,  $J$  8.0, 2.0 and 1.0, CH-g), 7.76 (1 H, ddd,  $J$  8.0, 2.0 and 1.0, CH-e), 7.60 (1 H, ddd,  $J$  8.0, 8.0 and 2.0, CH-f), 7.47 (1 H, dd,  $J$  8.0 and 2.0, CH-d), 7.40 (1 H, ddd,



*J* 8.0, 8.0 and 2.0, CH-b), 7.14 (1 H, ddd, *J* 8.0, 8.0 and 1.0, CH-c), 5.87 [1 H, s, (CHO<sub>2</sub>)], 4.19-4.09 [2 H, m, (OCH<sub>2</sub>CH<sub>2</sub>O)] and 4.09-4.00 [2 H, m, (OCH<sub>2</sub>CH<sub>2</sub>O)]; δ<sub>C</sub> (75 MHz; *d*<sub>6</sub>-DMSO) 153.2 (C=O), 148.9 (C), 141.9 (C), 141.4 (C), 137.4 (C), 130.9 (CH), 130.0 (CH), 128.0 (CH), 125.4 (CH), 124.9 (CH), 123.9 (CH), 117.0 (CH), 112.8 (CH), 101.8 (CH) and 65.5 [(CH<sub>2</sub>) × 2]; *m/z* (ES<sup>+</sup>) 330 (100 %, M+H<sup>+</sup>); (Found: M+H<sup>+</sup>, 330.1091, C<sub>16</sub>H<sub>16</sub>N<sub>3</sub>O<sub>5</sub> requires *M*+*H*, 330.1084).

The 1-(2-(1,3-Dioxolan-2-yl)phenyl)-3-(3-nitrophenyl)urea (4.4 g, 15 mmol) was dissolved in THF (100 cm<sup>3</sup>), IPA (100 cm<sup>3</sup>), triethylamine (2.7 cm<sup>3</sup>, 20 mmol), 10 % palladium on carbon (0.16 g, 0.15 mmol) added and the suspension stirred under a hydrogen atmosphere for 18 h. The suspension was filtered through celite and concentrated under reduced pressure. The residue was purified by flash column chromatography (SiO<sub>2</sub>; 1 % Et<sub>3</sub>N, 49 % EtOAc in petrol) to give 1-(2-(1,3-dioxolan-2-yl)phenyl)-3-(3-aminophenyl)urea **12** (3.62 g, 80 %), as white plates, m.p. 189-191 °C (from EtOAc-petrol); *R*<sub>f</sub> (2 % Et<sub>3</sub>N in EtOAc) 0.18; ν<sub>max</sub> (film)/cm<sup>-1</sup> 3351 (N-H) and 1672 (C=O); δ<sub>H</sub> (300 MHz; *d*<sub>6</sub>-DMSO) 8.97 [1 H, s, (NH)<sub>A</sub>], 7.94 [1 H, s, (NH)<sub>B</sub>], 7.87 (1 H, dd, *J* 8.0 and 1.0, CH-a), 7.41 (1 H, dd, *J* 8.0 and 1.0, CH-d), 7.30 (1 H, ddd, *J* 8.0, 8.0 and 1.0, CH-b), 7.02 (1 H, ddd, *J* 8.0, 8.0 and 1.0, CH-c), 6.90 (1 H, dd, *J* 8.0 and 8.0, CH-f), 6.85 (1 H, dd, *J* 2.0 and 2.0, CH-h), 6.60 (1 H, ddd, *J* 8.0, 2.0 and 1.0, CH-e), 6.24 (1 H, ddd, *J* 8.0, 2.0 and 1.0, CH-g), 5.82 [1 H, s, (CHO<sub>2</sub>)], 4.76 [2 H, s, (NH<sub>2</sub>)] and 4.15-4.08 [2 H, m, (OCH<sub>2</sub>CH<sub>2</sub>O)] and 4.07-3.97 [2 H, m, (OCH<sub>2</sub>CH<sub>2</sub>O)]; δ<sub>C</sub> (75 MHz; *d*<sub>6</sub>-DMSO) 153.2 (C=O), 149.4 (C), 141.0 (C), 138.1 (C), 129.7 (CH), 129.6 (CH), 127.5 (CH), 127.2 (C), 123.4 (CH), 122.8 (CH), 109.1 (CH), 107.6 (CH), 105.2 (CH), 101.9 (CH) and 65.4 [(CH<sub>2</sub>) × 2]; *m/z* (ES<sup>+</sup>) 300 (100 %, M+H<sup>+</sup>); (Found: M+H<sup>+</sup>, 300.1339, C<sub>16</sub>H<sub>18</sub>N<sub>3</sub>O<sub>3</sub> requires *M*+*H*, 300.1343).

### 1-(2-(1,3-Dioxolan-2-yl)phenyl)-1,3-dimethyl-3-(3-(3-(2-bromophenyl)-1,3-dimethyl-ureido)phenyl)urea, **13**

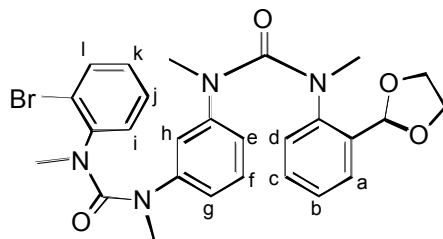

1-(2-(1,3-Dioxolan-2-yl)phenyl)-3-(3-aminophenyl)urea **12** (1.0 g, 3.3 mmol) was dissolved in THF (50 cm<sup>3</sup>), 2-bromophenylisocyanate (0.41 cm<sup>3</sup>, 3.3 mmol) added dropwise, stirred for 18 h and concentrated. The residue was purified by recrystallisation from CH<sub>2</sub>Cl<sub>2</sub>-petrol to give 1-(2-(1,3-dioxolan-2-yl)phenyl)-3-(3-(3-(2-bromophenyl)ureido)phenyl)urea (1.59 g, 97 %) as colourless prisms, m.p. 106-108 °C (from CH<sub>2</sub>Cl<sub>2</sub>-petrol); *R*<sub>f</sub> (2 % Et<sub>3</sub>N, 49 % EtOAc in petrol) 0.70; ν<sub>max</sub> (film)/cm<sup>-1</sup> 3412 and 3312 (N-H), 1738 and 1715 (C=O) and 747 (C-Br); δ<sub>H</sub> (300 MHz; *d*<sub>6</sub>-DMSO) 9.56 (1 H, s, NH), 9.44 (1 H, s, NH), 8.15 (1 H, s, NH), 8.13 (1 H, dd, *J* 8.0 and 1.5, CH-l), 8.05 (1 H, s, NH), 7.88 (1 H, dd, *J* 8.0 and 1.5, CH-a), 7.80 (1 H, t, *J* 1.5, CH-h), 7.64 (1 H, dd, *J* 8.0 and 1.5, CH-i), 7.45 (1 H, dd, *J* 8.0 and 1.5, CH-d), 7.37 (2 H, m, CH-e and CH-g), 7.25-7.05 (4 H, m, CH-c,

CH-f, CH-j and CH-k), 6.99 (1 H, ddd,  $J$  8.0, 8.0 and 1.5, CH-b), 5.87 [1 H, s, (CHO<sub>2</sub>)] and 4.19-3.99 [4 H, m, (OCH<sub>2</sub>CH<sub>2</sub>O)];  $\delta_c$  (75 MHz;  $d_6$ -DMSO) 153.2 (C=O), 152.8 (C=O), 141.1 (C), 140.7 (C), 138.0 (C), 137.8 (C), 133.2 (CH), 129.9 (CH), 128.8 (CH), 127.7 (C), 127.5 (CH), 124.7 (CH), 124.4 (CH), 123.5 (CH), 123.2 (CH), 122.7 (CH), 113.6 (C), 112.8 (CH), 112.4 (CH), 108.7 (CH), 101.7 (CH), and 65.5 [(CH<sub>2</sub>)  $\times$  2];  $m/z$  (ES<sup>+</sup>) 519 (100 %, M+Na<sup>+</sup>); (Found: M+Na<sup>+</sup>, 519.0642, C<sub>23</sub>H<sub>21</sub>N<sub>4</sub>O<sub>4</sub>BrNa requires  $M+Na$ , 519.0638).

The 1-(2-(1,3-Dioxolan-2-yl)phenyl)-3-(3-(3-(2-bromophenyl)ureido)phenyl)urea (1.58 g, 3.18 mmol) was dissolved in DMF (50 cm<sup>3</sup>) and cooled to 0 °C. Sodium hydride (0.64 g, 16.0 mmol) was added portionwise and stirred at room temperature for 1 h. Methyl iodide (1.12 cm<sup>3</sup>, 18.0 mmol) was added and stirred at room temperature for 21 h. Water (50 cm<sup>3</sup>) was added and extracted with EtOAc (3  $\times$  40 cm<sup>3</sup>). The combined organic fractions were dried (MgSO<sub>4</sub>), filtered and concentrated under reduced pressure. The residue was purified by flash column chromatography (SiO<sub>2</sub>; 10 % EtOAc and 2 % Et<sub>3</sub>N in petrol) to give 1-(2-(1,3-dioxolan-2-yl)phenyl)-1,3-dimethyl-3-(3-(3-(2-bromophenyl)-1,3-dimethyl-ureido)phenyl)urea **13** (1.65 g, 94 %), as colourless cubes, m.p. 190-192 °C (from EtOAc-pentane);  $R_f$  (2 % Et<sub>3</sub>N, 49 % EtOAc in petrol) 0.35;  $\nu_{max}$  (film)/cm<sup>-1</sup> 1738 and 1716 (C=O) and 735(C-Br);  $\delta_H$  (300 MHz; CDCl<sub>3</sub>) 7.33 (1 H, dd,  $J$  8.0 and 1.5, CH-l), 7.06 (1 H, td,  $J$  8.0 and 1.5, CH-j), 7.00 (1 H, td,  $J$  8.0 and 1.5, CH-k), 6.94 (1 H, td,  $J$  8.0 and 1.5, CH-b), 6.85 (1 H, dd,  $J$  8.0 and 1.5, CH-i), 6.79 (1 H, t,  $J$  8.0, CH-f) 6.78 (1 H, td,  $J$  8.0 and 1.5, CH-c), 6.69 (1 H, dd,  $J$  8.0 and 1.5, CH-d), 6.58 (1 H, dd,  $J$  8.0 and 1.5, CH-a), 6.51 (1 H, m, CH-e or CH-g), 6.44 (1 H, m, CH-g or CH-e), 6.11 (1 H, d,  $J$  1.5 and 1.5, CH-h), 5.58 [1 H, s, (CHO<sub>2</sub>)], 4.18-3.97 [4 H, m, (OCH<sub>2</sub>CH<sub>2</sub>O)], 3.17 [3 H, s, (NCH<sub>3</sub>)<sub>A</sub>], 3.13 [3 H, s, (NCH<sub>3</sub>)<sub>B</sub>], 3.03 [3 H, s, (NCH<sub>3</sub>)<sub>C</sub>] and 2.98 [3 H, s, (NCH<sub>3</sub>)<sub>D</sub>];  $\delta_c$  (75 MHz; CDCl<sub>3</sub>) 161.4 (C=O), 160.5 (C=O), 146.0 (C), 145.8 (C), 144.2 (C), 144.0 (C), 134.7 (C), 133.4 (CH), 130.2 (CH), 129.8 (CH), 129.2 (CH), 128.4 (CH), 128.0 (CH), 127.6 (CH), 127.4 (CH), 126.8 (CH), 123.7 (CH), 123.4 (CH), 123.3 (CH), 122.9 (C), 99.7 (CH), 65.5 [(CH<sub>2</sub>)  $\times$  2], 40.5 (NCH<sub>3</sub>)<sub>A</sub>, 40.0 (NCH<sub>3</sub>)<sub>B</sub>, 39.9 (NCH<sub>3</sub>)<sub>C</sub> and 38.8 (NCH<sub>3</sub>)<sub>D</sub>  $m/z$  (ES<sup>+</sup>) 575 (100 %, M+Na<sup>+</sup>); (Found: M+Na<sup>+</sup>, 575.1269, C<sub>27</sub>H<sub>29</sub>N<sub>4</sub>O<sub>4</sub>BrNa requires  $M+Na$ , 575.1264).

**1-(2-(*tert*-Butylsulfinyl)phenyl)-1,3-dimethyl-3-(3-(3-(2-formylphenyl)-1,3-dimethyl-ureido)phenyl)urea, 14**

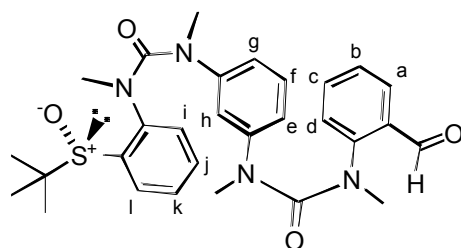

1-(2-(1,3-Dioxolan-2-yl)phenyl)-1,3-dimethyl-3-(3-(3-(2-bromophenyl)-1,3-dimethyl-ureido)phenyl)urea **13** (1.10 g, 1.99 mmol) was dissolved in THF (100 cm<sup>3</sup>) and cooled to -90 °C. *n*-Butyllithium (1.19 cm<sup>3</sup>, 2.28 mmol, 1.92 M in hexanes) was added dropwise and stirred for 1 min at -90 °C. After this time, (*S*)-*tert*-Butyl 2-methylpropane-2-sulfinothioate<sup>1</sup> [0.59 g, 2.99 mmol in THF (6.0 cm<sup>3</sup>)] was added in one portion and stirred at -

90 °C for 5 min. After warming to room temperature over 18 h, saturated aqueous ammonium chloride (10 cm<sup>3</sup>) and water (20 cm<sup>3</sup>) were added and the aqueous layer extracted with EtOAc (3 × 30 cm<sup>3</sup>). The combined organic fractions were dried (MgSO<sub>4</sub>), filtered and concentrated under reduced pressure. The residue was purified by flash column chromatography (SiO<sub>2</sub>; 20 % EtOAc and 2 % Et<sub>3</sub>N in petrol to 2 % Et<sub>3</sub>N in EtOAc) to give *1-(2-(1,3-dioxolan-2-yl)phenyl)-1,3-dimethyl-3-(3-(3-(2-(tert-butylsulfinyl)phenyl)-1,3-dimethyl-ureido)phenyl)urea* (0.68 g, 61 %), as colourless cubes, m.p. 245-247 °C (from EtOAc-petrol);  $[\alpha]_D^{22} = +47.2$  (c = 0.5 in CH<sub>2</sub>Cl<sub>2</sub>);  $R_f$  (2 % Et<sub>3</sub>N in EtOAc) 0.32;  $\nu_{\max}$  (film)/cm<sup>-1</sup> 1724 (C=O), 1655 (C=O) and 1072 (S=O);  $\delta_H$  (300 MHz; CDCl<sub>3</sub>) 7.56 (1 H, dd, *J* 8.0 and 2.0, CH-l), 7.27 (1 H, dd, *J* 8.0 and 2.0, CH-i), 7.05-6.78 (4 H, m, CH-b, CH-c, CH-j and CH-k), 6.65 (1 H, d, *J* 8.0, CH-d), 6.39 (1 H, dd, 8.0 and 1.0, CH-a), 6.35 (2 H, dd, *J* 8.0 and 2.0, CH-e and CH-g), 6.03 (1 H, dd, *J* 2.0 and 2.0, CH-h), 5.47 [1 H, s, (CHO<sub>2</sub>)], 4.14-3.82 [4 H, m, (OCH<sub>2</sub>CH<sub>2</sub>O)], 3.18 [3 H, s, (NCH<sub>3</sub>)<sub>A</sub>], 3.09 [3 H, s, (NCH<sub>3</sub>)<sub>B</sub>], 3.01 [3 H, s, (NCH<sub>3</sub>)<sub>C</sub>], 2.91 [3 H, s, (NCH<sub>3</sub>)<sub>D</sub>] and 1.08 [9 H, s, (CH<sub>3</sub>) × 3];  $\delta_C$  (75 MHz; CDCl<sub>3</sub>) 161.4 (C=O), 159.8 (C=O), 145.8 (C), 144.1 (C), 143.9 (C), 137.8 (C), 134.6 (C), 131.6 (CH), 129.8 (CH), 129.1 (CH), 128.3 (C), 127.4 (CH), 127.2 (CH), 126.8 (CH), 126.7 (CH), 125.4 (CH), 123.3 (CH), 123.1 (CH), 123.0 (CH), 122.9 (CH), 99.7 (CH), 65.5 [(CH<sub>2</sub>) × 2], 56.0 (C), 40.5 (NCH<sub>3</sub>)<sub>A</sub>, 39.7 (NCH<sub>3</sub>)<sub>B</sub>, 39.6 (NCH<sub>3</sub>)<sub>C</sub>, 39.2 (NCH<sub>3</sub>)<sub>D</sub> and 23.0 [(CH<sub>3</sub>) × 3]; *m/z* (ES<sup>+</sup>) 601 (100 %, M+Na<sup>+</sup>); (Found: M+Na<sup>+</sup>, 601.2454, C<sub>31</sub>H<sub>38</sub>N<sub>4</sub>O<sub>5</sub>NaS requires M+Na, 601.2455). *1-(2-(1,3-Dioxolan-2-yl)phenyl)-1,3-dimethyl-3-(3-(3-phenyl)-1,3-dimethyl-ureido)phenyl)urea* (0.33 g, 36 %) was also obtained as colourless cubes, m.p. 230-232 °C (from EtOAc-petrol);  $R_f$  (2 % Et<sub>3</sub>N in EtOAc) 0.50;  $\nu_{\max}$  (film)/cm<sup>-1</sup> 1710 (C=O), 1651 (C=O) and 1072 (S=O);  $\delta_H$  (300 MHz; CDCl<sub>3</sub>) 7.33 (1 H, dd, *J* 8.0 and 2.0, CH-a), 7.08-6.58 (4 H, m, Ar), 6.89 (1 H, tt, 7.0 and 1.0, CH-k), 6.75 (1 H, dd, *J* 8.0 and 8.0, CH-f), 6.72 (2 H, dd, *J* 7.0 and 1.0, CH-i), 6.57 (1 H, dd, *J* 8.0 and 1.0, CH-d), 6.49 (1 H, ddd, *J* 8.0, 2.0 and 1.0, CH-e), 6.38 (1 H, ddd, *J* 8.0, 2.0 and 1.0, CH-g), 6.06 (1 H, dd, *J* 2.0 and 2.0, CH-h), 5.53 [1 H, s, (CHO<sub>2</sub>)], 4.17-4.03 [2 H, m, (OCH<sub>2</sub>CH<sub>2</sub>O)], 4.02-3.93 [2 H, m, (OCH<sub>2</sub>CH<sub>2</sub>O)], 3.16 [3 H, s, (NCH<sub>3</sub>)<sub>A</sub>], 3.14 [3 H, s, (NCH<sub>3</sub>)<sub>B</sub>], 3.00 [3 H, s, (NCH<sub>3</sub>)<sub>C</sub>] and 2.94 [3 H, s, (NCH<sub>3</sub>)<sub>D</sub>]; No <sup>13</sup>C spectrum was recorded; *m/z* (ES<sup>+</sup>) 497 (100 %, M+Na<sup>+</sup>); (Found: M+Na<sup>+</sup>, 497.2159, C<sub>27</sub>H<sub>30</sub>N<sub>4</sub>O<sub>4</sub>Na requires M+Na, 497.2154).

The *1-(2-(1,3-Dioxolan-2-yl)phenyl)-1,3-dimethyl-3-(3-(3-(2-(tert-butylsulfinyl)phenyl)-1,3-dimethyl-ureido)phenyl)urea* (0.65 g, 1.12 mmol) was dissolved in THF (20 cm<sup>3</sup>), 1 N aqueous hydrochloric acid (20 cm<sup>3</sup>) added and stirred at room temperature for 16 h. The aqueous layer was extracted with EtOAc (3 × 20 cm<sup>3</sup>), the combined organic fractions dried (MgSO<sub>4</sub>), filtered and concentrated under reduced pressure. The residue was purified by flash column chromatography (SiO<sub>2</sub>; 50 % EtOAc in petrol) to give *1-(2-(tert-butylsulfinyl)phenyl)-1,3-dimethyl-3-(3-(3-(2-formylphenyl)-1,3-dimethyl-ureido)phenyl)urea* **14** (0.59 g, 98 %), as colourless cubes, m.p. 215-217 °C (from EtOAc-pentane);  $[\alpha]_D^{23} = +40.0$  (c = 0.4 in CH<sub>2</sub>Cl<sub>2</sub>);  $R_f$  (50 % EtOAc in petrol) 0.50;  $\nu_{\max}$  (film)/cm<sup>-1</sup> 1691 (HC=O), 1654 (C=O) and 1032 (S=O);  $\delta_H$  (300 MHz; CDCl<sub>3</sub>) 9.79 (1 H, s, CH=O), 7.62 (1 H, dd, *J* 8.0 and 1.5, CH-a), 7.53 (1 H, dd, *J* 8.0 and 1.5, CH-d), 7.31 (1 H, ddd, *J* 8.0, 8.0 and 1.5, CH-c), 7.12 (1 H, ddd, *J* 8.0, 8.0 and 1.5, CH-j), 7.03 (1 H, ddd, *J* 8.0, 8.0 and 1.5, CH-b), 6.95 (1 H, td, *J* 8.0 and 1.5, CH-k),

6.85 (1 H, d,  $J$  8.0, CH-l), 6.69 (1 H, t,  $J$  8.0, CH-f), 6.47-6.30 (3 H, m, CH-e, CH-g and CH-i), 5.98 (1 H, dd,  $J$  1.5 and 1.5, CH-h), 3.23 [3 H, s, (NCH<sub>3</sub>)<sub>A</sub>], 3.22 [3 H, s, (NCH<sub>3</sub>)<sub>B</sub>], 3.00 [3 H, s, (NCH<sub>3</sub>)<sub>C</sub>], 2.99 [3 H, s, (NCH<sub>3</sub>)<sub>D</sub>] and 1.13 [9 H, s, (CH<sub>3</sub>) × 3];  $\delta_c$  (75 MHz; CDCl<sub>3</sub>) 189.4 (HC=O), 161.2 (C=O), 159.5 (C=O), 147.9 (C), 146.0 (C), 145.2 (C), 143.8 (C), 137.8 (C), 134.6 (CH), 131.7 (CH), 131.2 (C), 129.2 (CH), 129.0 (CH), 128.8 (CH), 128.2 (CH), 127.2 (CH), 126.9 (CH), 126.6 (CH), 125.5 (CH), 123.4 (CH), 123.2 (CH), 56.0 (C), 41.2 (NCH<sub>3</sub>)<sub>A</sub>, 39.6 (NCH<sub>3</sub>)<sub>B</sub>, 39.5 (NCH<sub>3</sub>)<sub>C</sub>, 39.2 (NCH<sub>3</sub>)<sub>D</sub> and 23.0 [(CH<sub>3</sub>) × 3];  $m/z$  (ES<sup>+</sup>) 535 (100 %, M+H<sup>+</sup>); (Found: M+H<sup>+</sup>, 535.2379, C<sub>29</sub>H<sub>35</sub>N<sub>4</sub>O<sub>4</sub>S requires M+H, 535.2374).

***1-(2-(tert-Butylsulfinyl)phenyl)-1,3-dimethyl-3-(3-(3-(2-(hydroxy-(phenyl)methyl)phenyl)-1,3-dimethylureido)phenyl)urea, 15***

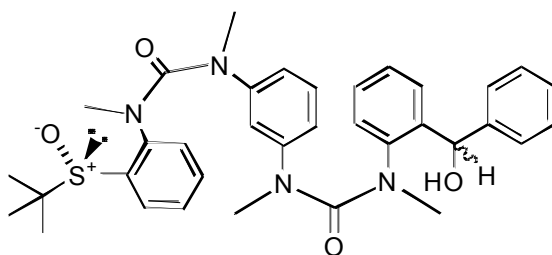

**Method 1**

1-(2-(*tert*-Butylsulfinyl)phenyl)-1,3-dimethyl-3-(3-(3-(2-formylphenyl)-1,3-dimethyl-ureido)phenyl)urea **14** (0.10 g, 0.18 mmol) was dissolved in THF (5 cm<sup>3</sup>), cooled to −78 °C and DMPU (0.24 cm<sup>3</sup>, 1.8 mmol) added. PhMgBr (0.54 cm<sup>3</sup>, 0.54 mmol, 1.0 M in hexanes) was added dropwise and stirred at −78 °C for 5 h. MeOH (5 cm<sup>3</sup>) was added, warmed to room temperature and water (10 cm<sup>3</sup>) added. The aqueous layer was extracted with EtOAc (3 × 20 cm<sup>3</sup>) and the combined organic fractions dried (MgSO<sub>4</sub>), filtered and concentrated under reduced pressure. The residue was purified by flash column chromatography (SiO<sub>2</sub>; petrol to EtOAc) to give a mixture of inseparable diastereoisomers of *1-(2-(tert-butylsulfinyl)phenyl)-1,3-dimethyl-3-(3-(3-(2-(hydroxy-(phenyl)methyl)phenyl)-1,3-dimethylureido)phenyl)urea 15* (0.102 g, 90 %), as colourless cubes, m.p. 254-256 °C (from EtOAc-petrol);  $[\alpha]_D^{23} = -8.1$  ( $c = 0.3$  in CH<sub>2</sub>Cl<sub>2</sub>);  $R_f$  (EtOAc) 0.27;  $\nu_{\max}$  (film)/cm<sup>−1</sup> 3387 (OH), 1654 (C=O), 1636 (C=O) and 1032 (S=O);  $\delta_H$  (300 MHz; CDCl<sub>3</sub>) 7.65-7.53 (2 H, m, Ar<sup>*maj and min*</sup>), 7.52-7.41 (2 H, m, Ar<sup>*maj and min*</sup>), 7.36-7.16 (8 H, m, Ar<sup>*maj and min*</sup>), 7.13-6.75 (12 H, m, Ar<sup>*maj and min*</sup>), 7.65 (2 H, dd,  $J$  8.0 and 8.0, Ar<sup>*maj and min*</sup>), 6.58-6.31 (6 H, m, Ar<sup>*maj and min*</sup>), 6.17 (2 H, dd,  $J$  2.0 and 2.0, Ar<sup>*maj and min*</sup>), 5.71 [1 H, s, (Ar(CH)OHAr)<sup>*maj*</sup>], 5.66 [1 H, s, (Ar(CH)OHAr)<sup>*min*</sup>], 3.21 [3 H, s, (NCH<sub>3</sub>)<sub>A</sub><sup>*maj and min*</sup>], 3.06 [3 H, s, (NCH<sub>3</sub>)<sub>B</sub><sup>*maj and min*</sup>], 2.91 [3 H, s, (NCH<sub>3</sub>)<sub>C</sub><sup>*maj and min*</sup>], 2.88 [3 H, s, (NCH<sub>3</sub>)<sub>D</sub><sup>*maj and min*</sup>] and 1.14-1.02 [18 H, s, {(CH<sub>3</sub>) × 3}<sup>*maj and min*</sup>];  $\delta_c$  (75 MHz; CDCl<sub>3</sub>) 161.4 (C=O)<sup>*maj*</sup>, 160.8 (C=O)<sup>*min*</sup>, 159.8 (C=O)<sup>*maj*</sup>, 159.5 (C=O)<sup>*min*</sup>, 147.8 (C)<sup>*maj*</sup>, 146.5 (C)<sup>*min*</sup>, 146.3 (C)<sup>*maj*</sup>, 146.1 (C)<sup>*min*</sup>, 145.9 (C)<sup>*maj*</sup>, 145.2 (C)<sup>*min*</sup>, 143.9 (C)<sup>*maj*</sup>, 143.4 (C)<sup>*min*</sup>, 142.8 (C)<sup>*maj*</sup>, 142.6 (C)<sup>*min*</sup>, 141.1 (C)<sup>*maj*</sup>, 137.7 (C)<sup>*min*</sup>, 137.4 (C)<sup>*maj*</sup>, 134.6 (C)<sup>*min*</sup>, 131.8 (CH)<sup>*maj*</sup>, 131.7 (CH)<sup>*min*</sup>, 131.2 (CH)<sup>*maj*</sup>, 129.2 (CH)<sup>*min*</sup>, 129.1 (CH)<sup>*maj*</sup>, 129.0 (CH)<sup>*min*</sup>, 128.5 (CH)<sup>*maj*</sup>, 128.4 (CH)<sup>*maj*</sup>, 128.2 (CH)<sup>*min*</sup>, 127.7 (CH)<sup>*maj*</sup>, 127.6 (CH)<sup>*min*</sup>, 127.4

(CH)<sup>maj</sup>, 127.3 (CH)<sup>min</sup>, 127.22 (CH)<sup>maj</sup>, 127.17 (CH)<sup>min</sup>, 126.9 (CH)<sup>maj</sup>, 126.6 (CH)<sup>min</sup>, 125.6 (CH)<sup>maj</sup>, 125.5 (CH)<sup>min</sup>, 123.4 (CH)<sup>maj</sup>, 123.1 (CH)<sup>min</sup>, 122.81 (CH)<sup>maj</sup>, 122.80 (CH)<sup>min</sup>, 71.2 (CH)<sup>maj</sup>, 71.0 (CH)<sup>min</sup>, 56.0 (C)<sup>maj</sup>, 55.8 (C)<sup>min</sup>, 40.2 (NCH<sub>3</sub>)<sub>A</sub><sup>maj</sup>, 40.1 (NCH<sub>3</sub>)<sub>A</sub><sup>min</sup>, 39.8 (NCH<sub>3</sub>)<sub>B</sub><sup>maj</sup>, 39.7 (NCH<sub>3</sub>)<sub>B</sub><sup>min</sup>, 39.6 (NCH<sub>3</sub>)<sub>C</sub><sup>maj</sup>, 39.5 (NCH<sub>3</sub>)<sub>C</sub><sup>min</sup>, 39.2 (NCH<sub>3</sub>)<sub>D</sub><sup>maj</sup>, 39.1 (NCH<sub>3</sub>)<sub>D</sub><sup>min</sup>, 23.0 [(CH<sub>3</sub>) × 3]<sup>maj</sup> and 22.9 [(CH<sub>3</sub>) × 3]<sup>min</sup>; m/z (ES<sup>+</sup>) 635 (100 %, M+Na<sup>+</sup>); (Found: M+Na<sup>+</sup>, 635.2660, C<sub>35</sub>H<sub>40</sub>N<sub>4</sub>O<sub>4</sub>NaS requires M+Na, 635.2662).

## Method 2

1-(2-(*tert*-Butylsulfinyl)phenyl)-1,3-dimethyl-3-(3-(3-(2-(benzoyl)phenyl)-1,3-dimethylureido)phenyl)urea **16** (0.13 g, 0.22 mmol) was dissolved in CH<sub>2</sub>Cl<sub>2</sub> (5 cm<sup>3</sup>) and cooled to −78 °C. DibalH (0.44 cm<sup>3</sup>, 0.44 mmol, 1.0 M in hexanes) was added dropwise and stirred at −78 °C for 8 h. MeOH (5 cm<sup>3</sup>) was added, warmed to room temperature and water (10 cm<sup>3</sup>) added. The aqueous layer was extracted with EtOAc (3 × 20 cm<sup>3</sup>) and the combined organic fractions dried (MgSO<sub>4</sub>), filtered and concentrated under reduced pressure. The residue was purified by flash column chromatography (SiO<sub>2</sub>; 20 % EtOAc in petrol) to give a mixture of inseparable diastereoisomers of 1-(2-(*tert*-butylsulfinyl)phenyl)-1,3-dimethyl-3-(3-(3-(2-(hydroxy-(phenyl)methyl)phenyl)-1,3-dimethylureido)phenyl)urea **15** (0.102 g, 90 %), as colourless cubes, m.p. 254-256 °C (from EtOAc-petrol); [α]<sub>D</sub><sup>23</sup> = −9.4 (c = 0.4 in CH<sub>2</sub>Cl<sub>2</sub>); R<sub>f</sub> (50 % EtOAc in petrol) 0.27; ν<sub>max</sub> (film)/cm<sup>−1</sup> 3387 (OH), 1654 (C=O), 1636 (C=O) and 1032 (S=O); δ<sub>H</sub> (300 MHz; CDCl<sub>3</sub>) 7.65-7.53 (2 H, m, Ar<sup>maj and min</sup>), 7.52-7.41 (2 H, m, Ar<sup>maj and min</sup>), 7.36-7.16 (8 H, m, Ar<sup>maj and min</sup>), 7.13-6.75 (12 H, m, Ar<sup>maj and min</sup>), 7.65 (2 H, dd, *J* 8.0 and 8.0, Ar<sup>maj and min</sup>), 6.58-6.31 (6 H, m, Ar<sup>maj and min</sup>), 6.17 (2 H, dd, *J* 2.0 and 2.0, Ar<sup>maj and min</sup>), 5.71 [1 H, s, (Ar(CH)OHAr)<sup>maj</sup>], 5.66 [1 H, s, (Ar(CH)OHAr)<sup>min</sup>], 3.21 [3 H, s, (NCH<sub>3</sub>)<sub>A</sub><sup>maj and min</sup>], 3.06 [3 H, s, (NCH<sub>3</sub>)<sub>B</sub><sup>maj and min</sup>], 2.91 [3 H, s, (NCH<sub>3</sub>)<sub>C</sub><sup>maj and min</sup>], 2.88 [3 H, s, (NCH<sub>3</sub>)<sub>D</sub><sup>maj and min</sup>] and 1.14-1.02 [18 H, s, {(CH<sub>3</sub>) × 3}<sup>maj and min</sup>]; δ<sub>C</sub> (75 MHz; CDCl<sub>3</sub>) 161.4 (C=O)<sup>maj</sup>, 160.8 (C=O)<sup>min</sup>, 159.8 (C=O)<sup>maj</sup>, 159.5 (C=O)<sup>min</sup>, 147.8 (C)<sup>maj</sup>, 146.5 (C)<sup>min</sup>, 146.3 (C)<sup>maj</sup>, 146.1 (C)<sup>min</sup>, 145.9 (C)<sup>maj</sup>, 145.2 (C)<sup>min</sup>, 143.9 (C)<sup>maj</sup>, 143.4 (C)<sup>min</sup>, 142.8 (C)<sup>maj</sup>, 142.6 (C)<sup>min</sup>, 141.1 (C)<sup>maj</sup>, 137.7 (C)<sup>min</sup>, 137.4 (C)<sup>maj</sup>, 134.6 (C)<sup>min</sup>, 131.8 (CH)<sup>maj</sup>, 131.7 (CH)<sup>min</sup>, 131.2 (CH)<sup>maj</sup>, 129.2 (CH)<sup>min</sup>, 129.1 (CH)<sup>maj</sup>, 129.0 (CH)<sup>min</sup>, 128.5 (CH)<sup>maj</sup>, 128.4 (CH)<sup>maj</sup>, 128.2 (CH)<sup>min</sup>, 127.7 (CH)<sup>maj</sup>, 127.6 (CH)<sup>min</sup>, 127.4 (CH)<sup>maj</sup>, 127.3 (CH)<sup>min</sup>, 127.22 (CH)<sup>maj</sup>, 127.17 (CH)<sup>min</sup>, 126.9 (CH)<sup>maj</sup>, 126.6 (CH)<sup>min</sup>, 125.6 (CH)<sup>maj</sup>, 125.5 (CH)<sup>min</sup>, 123.4 (CH)<sup>maj</sup>, 123.1 (CH)<sup>min</sup>, 122.81 (CH)<sup>maj</sup>, 122.80 (CH)<sup>min</sup>, 71.2 (CH)<sup>maj</sup>, 71.0 (CH)<sup>min</sup>, 56.0 (C)<sup>maj</sup>, 55.8 (C)<sup>min</sup>, 40.2 (NCH<sub>3</sub>)<sub>A</sub><sup>maj</sup>, 40.1 (NCH<sub>3</sub>)<sub>A</sub><sup>min</sup>, 39.8 (NCH<sub>3</sub>)<sub>B</sub><sup>maj</sup>, 39.7 (NCH<sub>3</sub>)<sub>B</sub><sup>min</sup>, 39.6 (NCH<sub>3</sub>)<sub>C</sub><sup>maj</sup>, 39.5 (NCH<sub>3</sub>)<sub>C</sub><sup>min</sup>, 39.2 (NCH<sub>3</sub>)<sub>D</sub><sup>maj</sup>, 39.1 (NCH<sub>3</sub>)<sub>D</sub><sup>min</sup>, 23.0 [(CH<sub>3</sub>) × 3]<sup>maj</sup> and 22.9 [(CH<sub>3</sub>) × 3]<sup>min</sup>; m/z (ES<sup>+</sup>) 635 (100 %, M+Na<sup>+</sup>); (Found: M+Na<sup>+</sup>, 635.2660, C<sub>35</sub>H<sub>40</sub>N<sub>4</sub>O<sub>4</sub>NaS requires M+Na, 635.2662).

**1-(2-(*tert*-Butylsulfinyl)phenyl)-1,3-dimethyl-3-(3-(3-(2-(benzoyl)phenyl)-1,3-dimethylureido)phenyl)urea, 16**

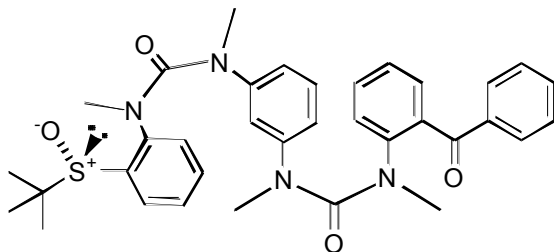

PCC (0.36 g, 1.8 mmol) was dissolved in CH<sub>2</sub>Cl<sub>2</sub> (18 cm<sup>3</sup>) at room temperature, 1-(2-(*tert*-Butylsulfinyl)phenyl)-1,3-dimethyl-3-(3-(3-(2-(hydroxy-(phenyl)methyl)phenyl)-1,3-dimethylureido)phenyl)urea **15** (1.1 g, 1.8 mmol) in CH<sub>2</sub>Cl<sub>2</sub> (18 cm<sup>3</sup>) added dropwise and stirred for 12 h. Diethyl ether (60 cm<sup>3</sup>) was added, the precipitate isolated, washed with ether (3 × 30 cm<sup>3</sup>) and the combined organics concentrated under reduced pressure. The residue was purified by flash column chromatography (SiO<sub>2</sub>; EtOAc to 10 % MeOH in EtOAc) to give a 1:1 ratio of inseparable rotamers of 1-(2-(*tert*-butylsulfinyl)phenyl)-1,3-dimethyl-3-(3-(3-(2-(benzoyl)phenyl)-1,3-dimethylureido)phenyl)urea **16** (0.70 g, 60 %), as colourless cubes, m.p. 262-264 °C (from EtOAc-MeOH); [α]<sub>D</sub><sup>23</sup> = + 18.4 (c = 0.5 in CH<sub>2</sub>Cl<sub>2</sub>); R<sub>f</sub> (EtOAc:MeOH; 9:1) 0.35; ν<sub>max</sub> (film)/cm<sup>-1</sup> 1716 (C=O), 1700 (C=O), 1651 (C=O) and 1086 (S=O); δ<sub>H</sub> (500 MHz; CDCl<sub>3</sub>) 7.62 (1 H, d, *J* 7.5, Ar<sup>maj</sup>), 7.58 (1 H, d, *J* 7.5, Ar<sup>min</sup>), 7.53 (2 H, dd, *J* 7.0 and 7.0, Ar<sup>maj and min</sup>), 7.41 (1 H, dd, *J* 7.5 and 7.5, Ar<sup>maj</sup>), 7.38 (1 H, dd, *J* 7.5 and 7.5, Ar<sup>min</sup>), 7.29-7.12 (6 H, m, Ar<sup>maj and min</sup>), 7.09-6.98 (2 H, m, Ar<sup>maj and min</sup>), 6.98-6.87 (4 H, m, Ar<sup>maj and min</sup>), 6.82 (1 H, dd, *J* 7.5 and 7.5, Ar<sup>maj</sup>), 6.76 (1 H, dd, *J* 7.5 and 7.5, Ar<sup>min</sup>), 6.59-6.52 (3 H, m, Ar<sup>maj</sup>), 6.52-6.37 (4 H, m, Ar<sup>min</sup>), 6.33 (2 H, dd, *J* 7.5 and 7.5, 2 × Ar<sup>maj</sup> and Ar<sup>min</sup>), 6.25 (2 H, d, *J* 7.5, Ar<sup>min</sup>), 6.14 (2 H, br., Ar<sup>maj</sup>), 3.18 [3 H, s, (NCH<sub>3</sub>)<sub>A</sub><sup>min</sup>], 3.15 [3 H, s, (NCH<sub>3</sub>)<sub>A</sub><sup>maj</sup>], 3.06 [3 H, s, (NCH<sub>3</sub>)<sub>B</sub><sup>maj</sup>], 3.02 [3 H, s, (NCH<sub>3</sub>)<sub>B</sub><sup>min</sup>], 2.97 [3 H, s, (NCH<sub>3</sub>)<sub>C</sub><sup>maj</sup>], 2.92-2.85 [3 H, m, (NCH<sub>3</sub>)<sub>C</sub><sup>min</sup>], 2.68 [3 H, s, (NCH<sub>3</sub>)<sub>D</sub><sup>maj</sup>], 2.66-2.61 [3 H, s, (NCH<sub>3</sub>)<sub>D</sub><sup>min</sup>] and 1.06 [18 H, s, {(CH<sub>3</sub>) × 3}<sup>maj and min</sup>]; δ<sub>C</sub> (75 MHz; CDCl<sub>3</sub>) 195.3 (ketone C=O)<sup>maj and min</sup>, 159.6 (urea C=O)<sup>maj and min</sup>, 159.4 (urea C=O)<sup>maj and min</sup>, 145.3 (C)<sup>maj and min</sup>, 143.7 (C)<sup>maj and min</sup>, 143.5 (C)<sup>maj and min</sup>, 143.3 (C)<sup>maj and min</sup>, 137.5 (C)<sup>maj and min</sup>, 137.2 (C)<sup>maj and min</sup>, 135.3 (C)<sup>maj and min</sup>, 133.4 (CH)<sup>maj and min</sup>, 131.4 (CH)<sup>maj and min</sup>, 131.1 (CH)<sup>maj and min</sup>, 129.8 (CH)<sup>maj and min</sup>, 129.6 (CH)<sup>maj and min</sup>, 128.7 (CH)<sup>maj and min</sup>, 128.4 (CH)<sup>maj and min</sup>, 128.3 (CH)<sup>maj and min</sup>, 127.1 (CH)<sup>maj and min</sup>, 127.0 (CH)<sup>maj and min</sup>, 126.4 (CH)<sup>maj and min</sup>, 125.3 (CH)<sup>maj and min</sup>, 125.2 (CH)<sup>maj and min</sup>, 121.8 (CH)<sup>maj and min</sup>, 121.6 (CH)<sup>maj and min</sup>, 55.7 (C)<sup>maj and min</sup>, 39.4 (NCH<sub>3</sub>)<sub>A</sub><sup>maj and min</sup>, 39.3 (NCH<sub>3</sub>)<sub>B</sub><sup>maj and min</sup>, 38.9 (NCH<sub>3</sub>)<sub>C</sub><sup>maj and min</sup>, 38.3 (NCH<sub>3</sub>)<sub>D</sub><sup>maj and min</sup> and 22.8 (CH<sub>3</sub>)<sup>maj and min</sup>, m/z (ES<sup>+</sup>) 633 (100 %, M+Na<sup>+</sup>) and 611 (60 %, M+H<sup>+</sup>); (Found: M+H<sup>+</sup>, 611.2692, C<sub>35</sub>H<sub>39</sub>N<sub>4</sub>O<sub>4</sub>S requires M+H, 611.2687).

<sup>1</sup> D. J. Weix and J. A. Ellman, *Org. Lett.*, 2003, **5**, 1317.
